# Supplementary material
Source: PubMed Central journal article supplement (PMC5378135)
Supplement: rsif20161003supp1.pdf [file rsif20161003supp1.pdf]

1 **Supplementary information**

2 ***In vivo* imaging of coral tissue and skeleton with optical**  
3 **coherence tomography**

4  
5 **Daniel Wangpraseurt<sup>1#</sup>, Camilla Wentzel<sup>1</sup>, Steven L Jacques<sup>2</sup>, Michael Wagner<sup>3</sup> and Michael**  
6 **Kühl<sup>1,4\*</sup>**

7 <sup>1</sup>Marine Biological Section, Department of Biology, University of Copenhagen, Strandpromenaden 5, Helsingør,  
8 Denmark, DK-3000

9 <sup>2</sup>Department of Biomedical Engineering, Oregon Health & Science University, 3303 SW Bond Ave., Portland,  
10 OR, 97239, USA

11 <sup>3</sup>Engler-Bunte Institute, Chair of Water Chemistry and Water Technology, Karlsruhe Institute of Technology,  
12 Engler-Bunte-Ring 1, D-76131 Karlsruhe, Germany

13 <sup>4</sup>Climate Change Cluster, University of Technology Sydney, PO Box 123, Broadway, Sydney, NSW 2007,  
14 Australia

15 **\*Correspondence and requests for materials should be addressed to D.W.**

16 **(email: [dw527@cam.ac.uk](mailto:dw527@cam.ac.uk)) or to M.K. (email: [mkuhl@bio.ku.dk](mailto:mkuhl@bio.ku.dk)).**

17 <sup>#</sup>present address: Department of Chemistry, University of Cambridge, Lensfield Road, Cambridge, UK

18 **Running title:** OCT imaging of corals

19 **Keywords:** optical coherence tomography, coral tissue, microstructure, bio-imaging, GFP

20

21 **Supplementary figures**

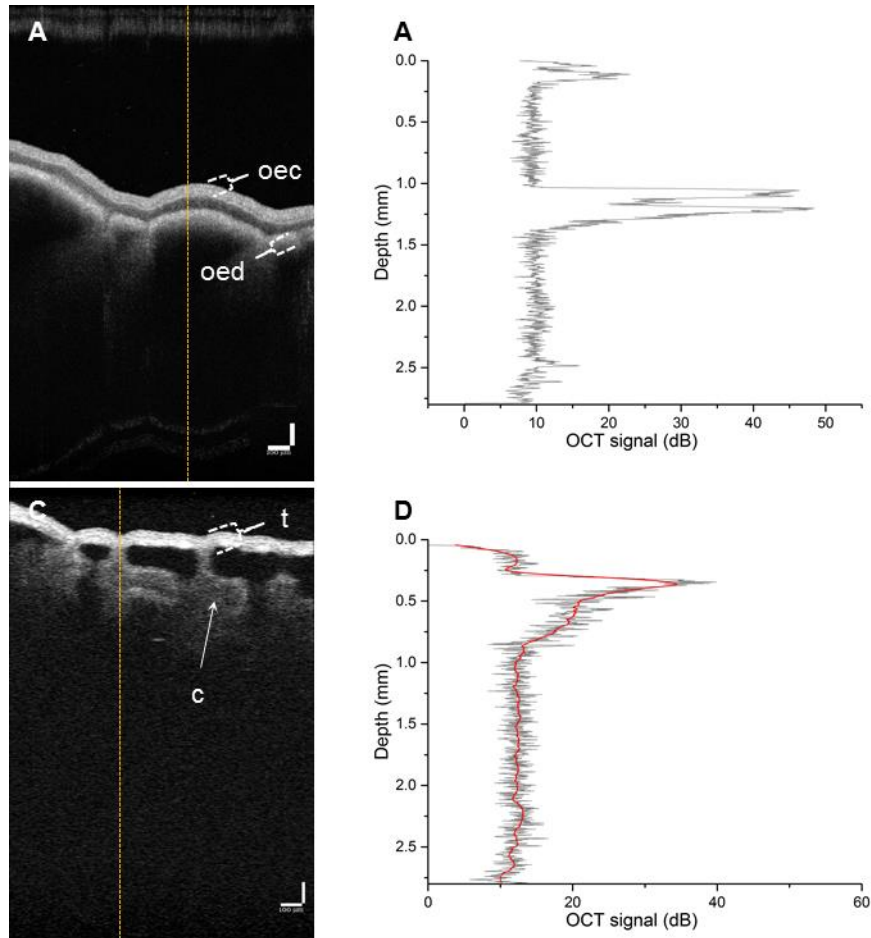

22

23 **Fig. S1: OCT B-scan and corresponding axial depth profile (A-scan) of the thick tissue coral**

24 *Favites abita* (A, B) and the thin-tissued *Acropora aspera* (c,d). The vertical orange dotted line in panel

25 A and C correspond to the axial scan in panel b and d, respectively. The B-scan visualizes the oral

26 ectoderm (oec) and the oral endoderm (oed) of *Favites abita*. Data for *Acropora aspera* was smoothed

27 (solid red line) in Origin 9.1 (Originlab, Northhampton, USA) using the Savitzky-Golay smoothing  
28 function with a 62 point window. The B-scan identifies the entire tissue (t) and skeletal channels (c).

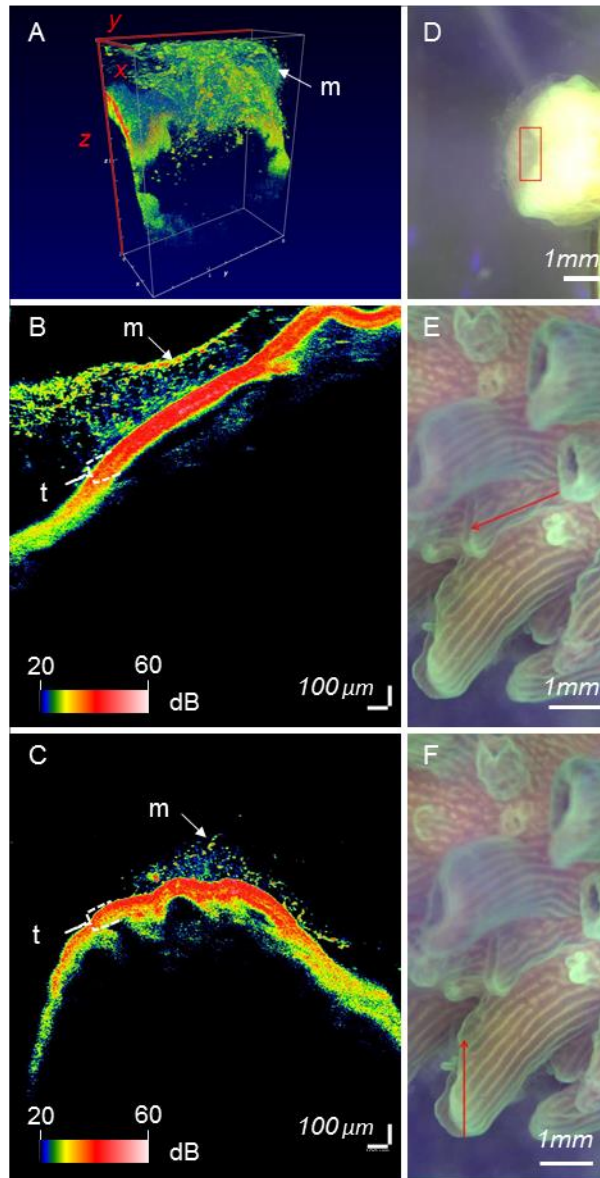

29

30 **Fig. S2: Additional examples of mucus release by the coral *Acropora aspera*.** OCT scans shown in  
31 A,B,C correspond to imaged areas and sections shown in D,E,F as indicated by red frame/arrows. The  
32 field of view of the 3D scan was  $x=0.7$  mm ,  $y=1.6$  mm and  $z=2.8$  mm. Note that any light scattering

33 particles trapped within the mucus will also be imaged by OCT, and might thus affect the  
34 quantification of mucus secretion.

35

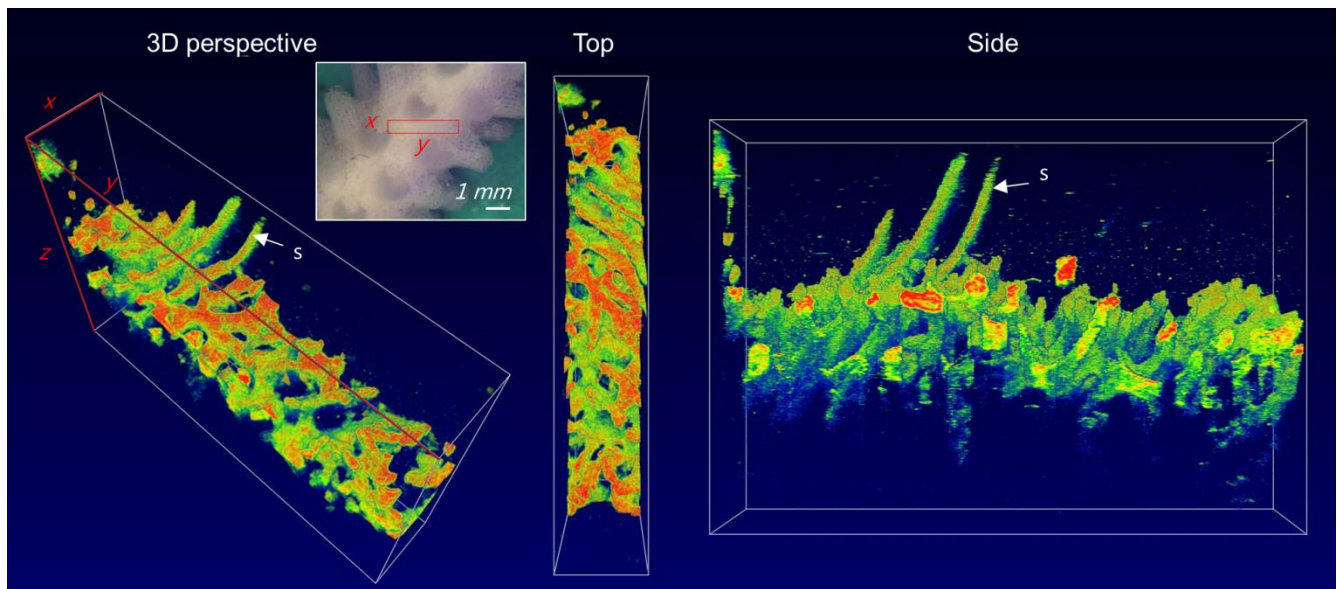

36

37 **Fig. S3: Three-dimensional OCT imaging of exposed naked skeleton of the coral *Acropora***  
38 ***pulchra*.** The scanned dimension were  $x= 0.6\text{mm}$ ,  $y= 3.1\text{mm}$  and  $z= 2.8\text{ mm}$ . The scan covers the  
39 coenosteum of a single branch and visualizes spinules (s) extruding as digitate structures from the  
40 branchlet.

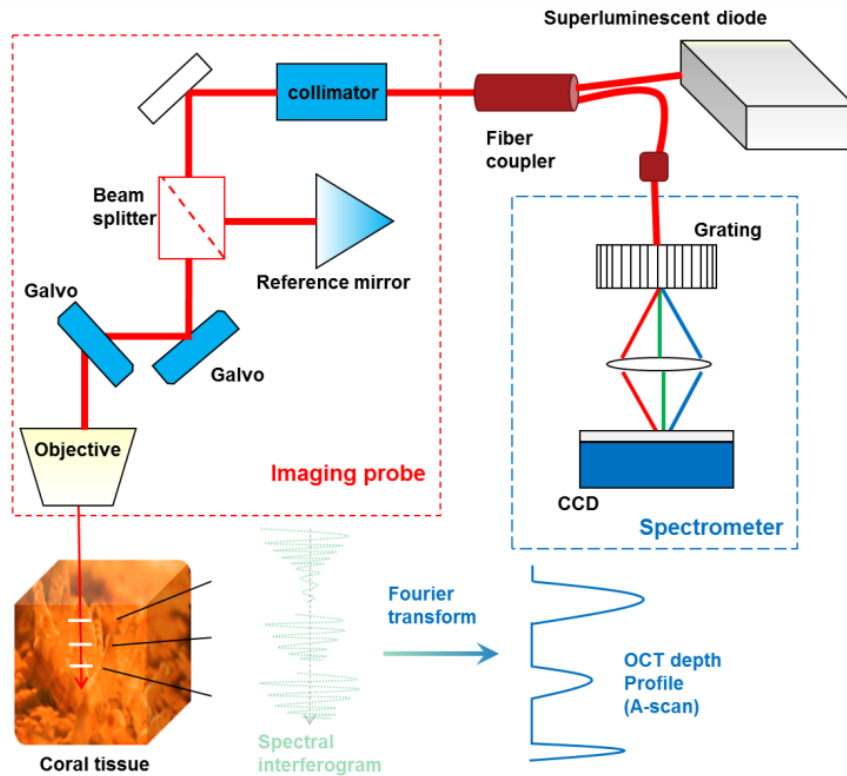

41

42 **Fig. S4. Principle of spectral-domain optical coherence tomography.** The super luminescent diode  
 43 provides broadband low coherent near infrared radiation (930 nm). Light is emitted through the fiber  
 44 and send to the imaging probe, which works like a modified Michelson interferometer. The beam  
 45 splitter sends light to the retro-reflecting prism (reference mirror) and the sample beam which is  
 46 focused by the scanning objective before it interacts with the coral tissue. Reflective boundaries within  
 47 the coral tissue (white lines) scatter light back to the imaging probe where, reference light and sample  
 48 light are combined and send to the spectrometer. A diffraction grating creates a characteristic spectral  
 49 interferogram (Fourier-domain signal), which is converted to an OCT depth profile of reflectivity along  
 50 the z-axis (A-scan) via Fourier transform. Two-dimensional (OCT B-scan) and three-dimensional  
 51 (OCT C-scan) tomographs are sampled by moving the sample beam within the imaging probe along the  
 52 x and y axis by a galvanometer system.

53 **Supplementary Movie 1. Video animation of 3D optical coherence tomography rendering of a**  
54 **single coral polyp (*Favites abdita*).** The rendering visualizes the convoluted surface topograph. The  
55 false color coding represents the intensity of the uncalibrated OCT signal, which was manually  
56 adjusted for to optimize visualization of structural features. The red areas identify the GFP granule  
57 containing chromatophore system. (<https://www.youtube.com/watch?v=P1IpCwjzZOc>)

58 **Supplementary Movie 2. Video animation of 2D optical coherence tomography scanning of the**  
59 **release of coral mucus.** Slight water movement in the experimental aquarium allowed for visualizing  
60 the movement of sheath like mucus structures adjacent to the surface of the coral *Acropora aspera*.  
61 (<https://www.youtube.com/watch?v=NR2GdiFsA-0>)

62 **Supplementary Movie 3: Video animation of 2D optical coherence tomography scanning**  
63 **revealing coral tissue contraction following high light stimulation.** The video shows the tissue of a  
64 *Favites abdita* polyp in cross-sectional view (monochrome mode). The white circle added in surface  
65 detection and subsequent linear velocity estimates of coral tissue (playback speed: 3x).  
66 <https://www.youtube.com/watch?v=ABRb8wk68n0>

67 **Additional movies can be found online:**

68 [https://www.youtube.com/channel/UCRXI\\_vkyIpG45SKgm79ff2w](https://www.youtube.com/channel/UCRXI_vkyIpG45SKgm79ff2w)
